# Supplementary material for: vIL-10-overexpressing human MSCs modulate naïve and activated T lymphocytes following induction of collagenase-induced osteoarthritis
Source: PubMed Central journal article supplement (PMC4870800; doi:10.1186/s13287-016-0331-2), 2016-05-18

**A**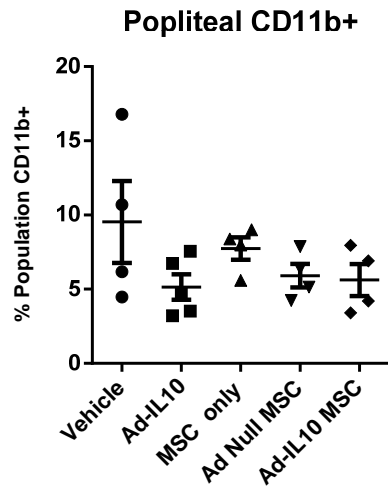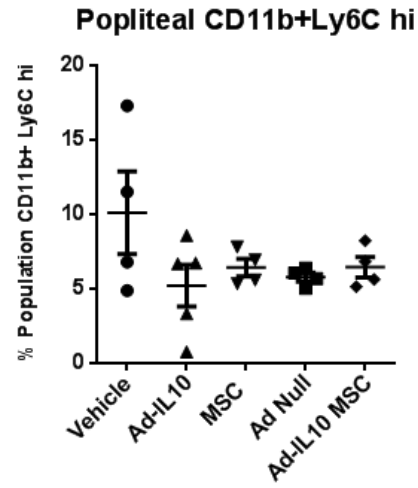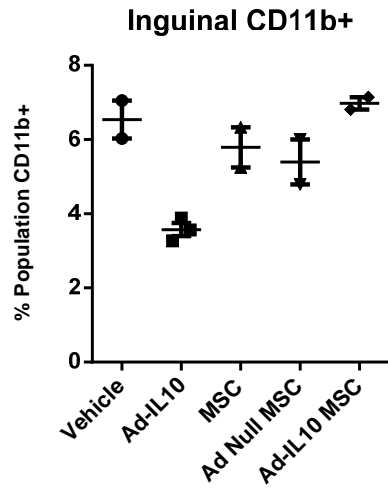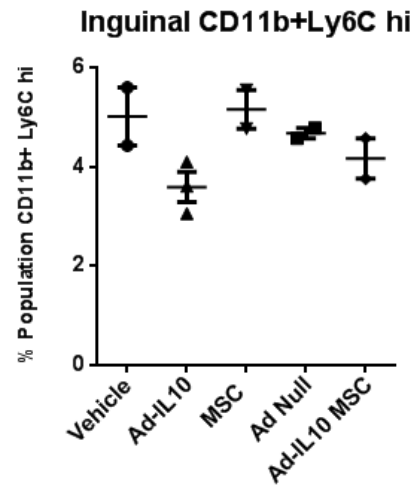**B**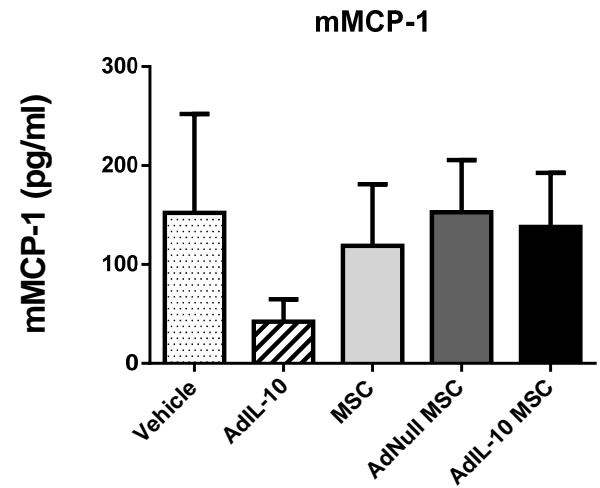

Supplement: 13287_2016_331_MOESM3_ESM.pdf [file 13287_2016_331_MOESM3_ESM.pdf]
